# Supplementary material
Source: publisher figshare collection journal article supplement (https://tandf.figshare.com/articles/dataset/_/5722327)
Supplement: Supplementary file 1 [file 1]

Archive with 2 entries (2 files):
- cjas_a_1414162_sm0354.pdf
- cjas_a_1414162_sm0353.pdf
