# Supplementary material
Source: publisher figshare collection journal article supplement (https://tandf.figshare.com/articles/dataset/_/5722327)
Supplement: Supplementary file 1 [file 1 › cjas_a_1414162_sm0353.pdf]

## **SUPPLEMENTAL MATERIAL:**

### **Results**

This supplemental material gives results about three complementary criteria : Overall Accuracy, Average Accuracy and Average Reliability ; only the Cohen's Kappa criterium is provided in the main article.

Table 1. Overall Accuracy (in %).

| Data set | $n_l$ | Proportion | Noise        | RGMM              | HDDA       | SVM               | RF         | FMLM       | NPDF              | FSVM              | FRF        |
|----------|-------|------------|--------------|-------------------|------------|-------------------|------------|------------|-------------------|-------------------|------------|
| Pavia    | 30    | Balanced   | Noiseless    | <b>82.8 (2.2)</b> | 80.3 (3.1) | 81.1 (2.2)        | 69.2 (2.8) | 72.5 (2.7) | 78.0 (3.4)        | 77.3 (2.1)        | 68.9 (2.5) |
|          | 120   | Balanced   | Noiseless    | <b>89.0 (1.3)</b> | 82.2 (1.8) | <b>89.0 (1.0)</b> | 78.3 (1.3) | 79.8 (1.2) | 86.9 (1.1)        | 84.9 (1.0)        | 77.1 (1.3) |
|          | 480   | Balanced   | Noiseless    | 91.8 (0.4)        | 83.4 (1.3) | <b>92.7 (0.4)</b> | 85.1 (0.9) | 84.6 (0.6) | 90.6 (0.4)        | 89.3 (0.5)        | 82.9 (0.7) |
| AISA     | 30    | Balanced   | Noiseless    | 64.7 (1.4)        | 63.8 (2.3) | 62.8 (1.3)        | 60.0 (1.2) | 61.4 (1.6) | <b>68.9 (1.1)</b> | 63.9 (1.7)        | 60.2 (1.3) |
|          | 120   | Balanced   | Noiseless    | 66.9 (0.8)        | 65.4 (1.4) | 71.1 (0.6)        | 67.0 (0.5) | 68.6 (1.0) | <b>76.2 (0.7)</b> | 75.1 (0.8)        | 67.9 (0.5) |
|          | 480   | Balanced   | Noiseless    | 66.9 (0.8)        | 64.6 (2.2) | 79.2 (0.4)        | 72.4 (0.4) | 72.6 (0.3) | <b>81.2 (0.3)</b> | <b>81.3 (0.3)</b> | 73.5 (0.3) |
| AVIRIS   | 30    | Balanced   | Noiseless    | 74.6 (2.2)        | 73.0 (2.6) | 63.1 (1.8)        | 66.8 (1.4) | 68.6 (2.5) | <b>76.3 (2.2)</b> | 71.1 (2.0)        | 67.0 (1.5) |
|          | 120   | Balanced   | Noiseless    | 82.5 (0.8)        | 78.3 (1.7) | 77.4 (1.0)        | 76.7 (1.1) | 78.1 (1.0) | <b>84.2 (0.8)</b> | 82.8 (1.0)        | 77.0 (1.0) |
|          | 480   | Balanced   | Noiseless    | 85.1 (0.7)        | 79.5 (0.6) | 84.4 (0.6)        | 82.5 (0.8) | 79.3 (0.8) | 86.3 (0.6)        | <b>87.6 (0.5)</b> | 82.7 (0.8) |
| Pavia    | 30    | S-prop.    | Noiseless    | 85.6 (2.7)        | 76.9 (2.3) | <b>86.5 (1.3)</b> | 79.5 (0.8) | 78.6 (1.7) | 83.4 (1.4)        | 83.2 (1.4)        | 79.1 (0.8) |
|          | 480   | S-prop.    | Noiseless    | 93.1 (0.2)        | 85.8 (1.0) | <b>94.4 (0.2)</b> | 90.1 (0.3) | 88.8 (0.3) | 91.2 (0.3)        | 89.3 (0.5)        | 83.0 (0.6) |
|          | 30    | D-prop.    | Noiseless    | <b>81.2 (3.2)</b> | 61.0 (4.8) | <b>81.1 (2.3)</b> | 66.9 (2.1) | 71.1 (2.1) | 77.0 (3.2)        | 76.0 (2.6)        | 66.3 (2.0) |
|          | 480   | D-prop.    | Noiseless    | 91.8 (0.4)        | 83.1 (1.1) | <b>92.5 (0.4)</b> | 83.6 (0.8) | 83.5 (0.9) | 89.1 (0.6)        | 92.2 (0.2)        | 88.3 (0.2) |
| AISA     | 30    | S-prop.    | Noiseless    | 65.7 (1.0)        | 61.1 (5.9) | 64.6 (0.9)        | 61.1 (0.9) | 64.4 (1.5) | <b>71.2 (1.0)</b> | 66.6 (1.2)        | 61.7 (0.8) |
|          | 480   | S-prop.    | Noiseless    | 70.2 (0.5)        | 67.5 (1.3) | 81.0 (0.3)        | 75.3 (0.3) | 75.0 (0.2) | <b>83.4 (0.2)</b> | 81.3 (0.3)        | 73.5 (0.3) |
|          | 30    | D-prop.    | Noiseless    | 64.8 (0.9)        | 60.4 (4.9) | 63.2 (1.2)        | 59.9 (1.1) | 62.3 (1.5) | <b>70.0 (1.2)</b> | 65.0 (1.5)        | 60.2 (1.4) |
|          | 480   | D-prop.    | Noiseless    | 69.6 (0.9)        | 66.4 (1.3) | 80.2 (0.3)        | 74.0 (0.3) | 73.7 (0.3) | 82.2 (0.2)        | <b>82.6 (0.2)</b> | 76.5 (0.3) |
| AVIRIS   | 30    | S-prop.    | Noiseless    | <b>76.9 (1.6)</b> | 71.0 (1.3) | 66.5 (1.2)        | 68.4 (1.5) | 71.0 (2.1) | <b>76.3 (2.4)</b> | 73.9 (1.7)        | 68.3 (1.8) |
|          | 480   | S-prop.    | Noiseless    | 89.7 (0.4)        | 84.3 (0.6) | 89.3 (0.5)        | 86.8 (0.4) | 84.9 (0.4) | 90.4 (0.4)        | <b>91.7 (0.4)</b> | 87.1 (0.4) |
|          | 30    | D-prop.    | Noiseless    | <b>74.8 (1.9)</b> | 70.6 (1.6) | 62.0 (1.6)        | 65.7 (1.8) | 68.5 (2.5) | <b>74.7 (2.3)</b> | 70.9 (1.7)        | 65.9 (1.7) |
|          | 480   | D-prop.    | Noiseless    | 85.8 (0.6)        | 80.7 (0.5) | 85.3 (0.5)        | 83.5 (0.6) | 80.1 (0.7) | 86.6 (0.5)        | <b>88.3 (0.5)</b> | 83.7 (0.5) |
| Pavia    | 30    | Balanced   | Weak Noise   | 67.6 (6.1)        | 62.1 (6.3) | 74.5 (4.7)        | 67.3 (3.3) | 65.3 (3.6) | <b>77.0 (3.8)</b> | 71.5 (3.3)        | 67.0 (3.0) |
|          | 480   | Balanced   | Weak Noise   | 79.7 (1.9)        | 62.4 (4.4) | <b>91.6 (0.4)</b> | 84.7 (1.0) | 77.3 (0.7) | 89.3 (0.5)        | 87.6 (0.6)        | 82.6 (0.8) |
|          | 30    | Balanced   | Strong Noise | 59.0 (7.3)        | 51.3 (6.4) | 68.8 (6.1)        | 63.1 (3.5) | 59.3 (5.8) | <b>72.0 (6.5)</b> | 65.9 (6.3)        | 63.5 (3.4) |
|          | 480   | Balanced   | Strong Noise | 74.6 (2.6)        | 53.2 (4.2) | <b>90.3 (0.7)</b> | 83.6 (1.1) | 74.3 (0.9) | 88.6 (0.7)        | 85.6 (0.8)        | 81.4 (1.1) |
| AISA     | 30    | Balanced   | Weak Noise   | 60.6 (2.4)        | 60.6 (2.0) | 60.2 (1.4)        | 58.6 (1.4) | 58.1 (1.8) | <b>68.8 (1.1)</b> | 60.4 (1.5)        | 58.4 (1.1) |
|          | 480   | Balanced   | Weak Noise   | 64.1 (0.9)        | 58.1 (2.6) | 76.8 (0.4)        | 72.1 (0.3) | 69.2 (0.6) | <b>80.8 (0.8)</b> | 79.2 (0.3)        | 73.1 (0.3) |
|          | 30    | Balanced   | Strong Noise | 56.2 (1.7)        | 56.0 (2.3) | 56.6 (1.9)        | 55.5 (1.8) | 54.0 (2.0) | <b>68.5 (1.1)</b> | 56.3 (2.0)        | 54.4 (2.0) |
|          | 480   | Balanced   | Strong Noise | 62.8 (1.3)        | 55.6 (2.2) | 73.6 (0.5)        | 71.4 (0.4) | 66.4 (0.8) | <b>79.7 (0.3)</b> | 77.2 (0.4)        | 72.0 (0.4) |
| AVIRIS   | 30    | Balanced   | Weak Noise   | 66.3 (2.9)        | 63.6 (3.2) | 58.4 (2.5)        | 64.2 (2.1) | 63.4 (2.6) | <b>75.4 (2.4)</b> | 64.4 (2.9)        | 64.4 (2.4) |
|          | 480   | Balanced   | Weak Noise   | 79.4 (1.4)        | 65.2 (1.3) | 80.6 (1.0)        | 81.9 (1.0) | 76.3 (0.7) | <b>85.7 (0.9)</b> | 84.9 (0.7)        | 81.9 (1.0) |
|          | 30    | Balanced   | Strong Noise | 59.8 (4.3)        | 56.9 (3.5) | 53.5 (3.5)        | 60.6 (3.2) | 58.8 (2.8) | <b>74.1 (3.3)</b> | 59.1 (4.0)        | 60.5 (2.9) |
|          | 480   | Balanced   | Strong Noise | 75.4 (1.7)        | 57.3 (3.4) | 77.1 (1.0)        | 80.8 (1.0) | 74.2 (0.9) | <b>85.3 (0.6)</b> | 82.8 (1.0)        | 80.5 (1.0) |

Table 2. Average Accuracy (in %).

| Data set | $n_l$ | Proportion | Noise        | RGMM              | HDDA       | SVM               | RF         | FMLM       | NPDF              | FSVM              | FRF        |
|----------|-------|------------|--------------|-------------------|------------|-------------------|------------|------------|-------------------|-------------------|------------|
| Pavia    | 30    | Balanced   | Noiseless    | <b>86.6 (1.2)</b> | 84.2 (1.3) | 85.7 (0.9)        | 79.0 (1.2) | 78.6 (1.5) | 84.0 (1.9)        | 83.0 (1.2)        | 78.5 (1.2) |
|          | 120   | Balanced   | Noiseless    | 90.4 (0.5)        | 85.7 (1.0) | <b>91.1 (0.6)</b> | 85.5 (0.5) | 85.0 (0.6) | 89.6 (0.6)        | 88.9 (0.5)        | 84.6 (0.6) |
|          | 480   | Balanced   | Noiseless    | 92.7 (0.2)        | 87.4 (0.6) | <b>93.7 (0.3)</b> | 89.7 (0.4) | 88.5 (0.3) | 92.1 (0.3)        | 91.9 (0.3)        | 88.5 (0.3) |
| AISA     | 30    | Balanced   | Noiseless    | 67.0 (1.7)        | 66.2 (2.1) | 65.4 (1.2)        | 61.7 (1.0) | 64.0 (1.3) | <b>72.4 (1.1)</b> | 66.3 (1.2)        | 62.1 (1.0) |
|          | 120   | Balanced   | Noiseless    | 70.8 (0.6)        | 68.3 (1.1) | 73.8 (0.6)        | 69.7 (0.4) | 70.9 (0.7) | <b>79.6 (0.5)</b> | 77.0 (0.7)        | 70.6 (0.4) |
|          | 480   | Balanced   | Noiseless    | 71.6 (0.4)        | 67.7 (1.7) | 81.2 (0.3)        | 75.6 (0.3) | 74.9 (0.3) | <b>84.1 (0.2)</b> | 83.0 (0.2)        | 76.5 (0.2) |
| AVIRIS   | 30    | Balanced   | Noiseless    | 80.5 (1.8)        | 78.9 (2.3) | 69.3 (1.4)        | 71.8 (1.4) | 74.3 (2.3) | <b>81.7 (1.8)</b> | 77.0 (1.7)        | 72.2 (1.2) |
|          | 120   | Balanced   | Noiseless    | 87.6 (0.5)        | 83.8 (1.2) | 83.4 (0.7)        | 81.8 (0.8) | 84.1 (0.7) | <b>88.9 (0.6)</b> | 87.8 (0.7)        | 82.4 (0.7) |
|          | 480   | Balanced   | Noiseless    | 92.0 (0.7)        | 87.1 (0.9) | 91.3 (0.6)        | 88.8 (0.8) | 87.8 (0.7) | 92.5 (0.6)        | <b>93.2 (0.7)</b> | 89.3 (0.9) |
| Pavia    | 30    | S-prop.    | Noiseless    | 79.7 (2.7)        | 71.1 (4.2) | <b>82.3 (2.0)</b> | 72.7 (1.9) | 72.5 (3.2) | 76.0 (2.7)        | 78.6 (2.6)        | 71.5 (2.0) |
|          | 480   | S-prop.    | Noiseless    | 91.4 (0.2)        | 86.9 (0.9) | <b>92.5 (0.3)</b> | 86.6 (0.5) | 85.2 (0.6) | 88.3 (0.5)        | 91.9 (0.2)        | 88.5 (0.3) |
|          | 30    | D-prop.    | Noiseless    | 83.4 (1.7)        | 72.2 (2.6) | <b>84.3 (1.6)</b> | 77.3 (1.3) | 75.9 (2.0) | 81.2 (2.0)        | 80.2 (2.0)        | 76.7 (1.5) |
|          | 480   | D-prop.    | Noiseless    | 92.3 (0.2)        | 86.1 (0.5) | <b>93.4 (0.2)</b> | 88.8 (0.4) | 86.9 (0.5) | 90.9 (0.4)        | 90.5 (0.3)        | 84.5 (0.5) |
| AISA     | 30    | S-prop.    | Noiseless    | 64.8 (0.9)        | 57.3 (4.2) | 60.2 (1.2)        | 55.7 (1.2) | 59.8 (1.9) | <b>67.3 (1.4)</b> | 62.1 (1.3)        | 56.3 (1.1) |
|          | 480   | S-prop.    | Noiseless    | 68.2 (1.7)        | 67.7 (0.9) | 78.0 (0.3)        | 72.0 (0.4) | 70.6 (0.3) | 81.5 (0.3)        | <b>83.0 (0.2)</b> | 76.5 (0.2) |
|          | 30    | D-prop.    | Noiseless    | 66.6 (0.8)        | 60.5 (5.0) | 64.5 (1.3)        | 60.7 (1.0) | 63.3 (1.5) | <b>79.1 (1.0)</b> | 65.7 (1.3)        | 61.0 (1.1) |
|          | 480   | D-prop.    | Noiseless    | 71.8 (0.9)        | 68.5 (1.0) | 81.2 (0.4)        | 75.8 (0.3) | 74.4 (0.2) | <b>83.9 (0.3)</b> | 79.8 (0.3)        | 73.2 (0.3) |
| AVIRIS   | 30    | S-prop.    | Noiseless    | <b>77.9 (2.5)</b> | 73.3 (1.6) | 66.0 (1.3)        | 66.1 (1.8) | 71.9 (2.8) | 75.8 (2.7)        | 74.8 (1.7)        | 66.0 (2.2) |
|          | 480   | S-prop.    | Noiseless    | 91.3 (0.4)        | 86.6 (0.6) | 90.5 (0.5)        | 86.2 (0.6) | 85.9 (0.5) | 91.2 (0.4)        | <b>92.7 (0.4)</b> | 86.7 (0.5) |
|          | 30    | D-prop.    | Noiseless    | <b>81.0 (1.2)</b> | 74.6 (1.5) | 69.2 (1.3)        | 71.7 (1.5) | 75.0 (2.6) | <b>80.6 (1.7)</b> | 77.5 (1.6)        | 72.1 (1.4) |
|          | 480   | D-prop.    | Noiseless    | 92.1 (0.8)        | 87.2 (1.2) | 91.6 (0.9)        | 89.1 (1.2) | 87.8 (1.1) | 92.2 (1.0)        | <b>93.4 (0.8)</b> | 89.7 (1.0) |
| Pavia    | 30    | Balanced   | Weak Noise   | 73.8 (3.5)        | 69.4 (3.2) | 81.1 (2.5)        | 76.8 (1.3) | 72.0 (2.4) | <b>83.6 (2.0)</b> | 78.6 (1.8)        | 77.0 (1.3) |
|          | 480   | Balanced   | Weak Noise   | 83.8 (1.2)        | 70.9 (1.3) | <b>92.9 (0.2)</b> | 89.3 (0.4) | 82.0 (0.4) | 91.4 (0.4)        | 91.0 (0.2)        | 88.1 (0.3) |
|          | 30    | Balanced   | Strong Noise | 64.3 (5.0)        | 60.6 (3.5) | 76.5 (3.0)        | 72.4 (2.2) | 66.2 (2.7) | <b>80.9 (3.6)</b> | 74.2 (2.4)        | 73.2 (2.5) |
|          | 480   | Balanced   | Strong Noise | 80.3 (1.5)        | 67.7 (1.5) | <b>92.1 (0.3)</b> | 88.4 (0.4) | 79.6 (0.6) | 90.9 (0.4)        | 90.2 (0.3)        | 87.3 (0.4) |
| AISA     | 30    | Balanced   | Weak Noise   | 62.1 (2.5)        | 62.2 (2.3) | 63.0 (1.3)        | 60.3 (1.2) | 60.8 (1.5) | <b>72.4 (1.1)</b> | 63.2 (1.3)        | 60.0 (1.0) |
|          | 480   | Balanced   | Weak Noise   | 68.5 (0.5)        | 62.3 (2.2) | 79.5 (0.3)        | 75.3 (0.3) | 72.0 (0.4) | <b>83.9 (0.5)</b> | 81.6 (0.3)        | 76.0 (0.3) |
|          | 30    | Balanced   | Strong Noise | 57.3 (1.7)        | 57.1 (2.6) | 59.3 (1.7)        | 57.3 (1.7) | 56.4 (2.0) | <b>72.1 (1.0)</b> | 58.8 (1.9)        | 56.0 (1.6) |
|          | 480   | Balanced   | Strong Noise | 66.6 (0.7)        | 60.9 (2.1) | 77.0 (0.4)        | 74.7 (0.3) | 69.5 (0.7) | <b>83.1 (0.2)</b> | 79.1 (0.4)        | 74.9 (0.2) |
| AVIRIS   | 30    | Balanced   | Weak Noise   | 71.7 (2.4)        | 69.0 (2.6) | 64.2 (1.9)        | 69.4 (1.5) | 69.0 (1.9) | <b>80.6 (2.1)</b> | 69.8 (2.2)        | 69.8 (1.8) |
|          | 480   | Balanced   | Weak Noise   | 87.5 (0.8)        | 75.3 (1.5) | 88.8 (0.8)        | 88.3 (1.1) | 85.9 (0.9) | <b>92.1 (0.8)</b> | <b>91.9 (0.7)</b> | 88.7 (1.0) |
|          | 30    | Balanced   | Strong Noise | 65.7 (3.7)        | 62.1 (2.2) | 58.7 (3.0)        | 65.6 (2.6) | 63.9 (2.6) | <b>79.2 (3.2)</b> | 64.3 (3.5)        | 65.7 (2.2) |
|          | 480   | Balanced   | Strong Noise | 84.4 (1.1)        | 67.4 (1.7) | 86.3 (1.1)        | 87.4 (1.0) | 84.3 (0.8) | <b>91.8 (0.6)</b> | 90.4 (0.9)        | 87.5 (1.0) |

Table 3. Average Reliability (in %).

| Data set | $n_l$ | Proportion | Noise        | RGMM              | HDDA       | SVM               | RF         | FMLM       | NPDF              | FSVM              | FRF        |
|----------|-------|------------|--------------|-------------------|------------|-------------------|------------|------------|-------------------|-------------------|------------|
| Pavia    | 30    | Balanced   | Noiseless    | <b>81.1 (1.6)</b> | 79.6 (2.4) | 79.6 (1.7)        | 71.1 (1.7) | 70.1 (2.5) | 76.9 (2.3)        | 76.6 (1.5)        | 70.7 (1.6) |
|          | 120   | Balanced   | Noiseless    | <b>85.7 (1.4)</b> | 79.6 (1.5) | <b>85.9 (1.0)</b> | 77.7 (0.8) | 76.6 (1.4) | 83.3 (0.9)        | 83.1 (0.9)        | 76.6 (0.8) |
|          | 480   | Balanced   | Noiseless    | 87.3 (0.6)        | 79.4 (1.1) | <b>88.9 (0.5)</b> | 81.8 (0.5) | 79.8 (1.3) | 86.1 (0.5)        | 86.2 (0.5)        | 80.1 (0.4) |
| AISA     | 30    | Balanced   | Noiseless    | 63.5 (1.2)        | 62.5 (2.0) | 60.7 (1.2)        | 57.4 (1.1) | 58.4 (1.6) | <b>67.3 (1.2)</b> | 61.6 (1.4)        | 57.5 (1.1) |
|          | 120   | Balanced   | Noiseless    | 67.5 (0.6)        | 64.5 (1.3) | 68.7 (0.5)        | 64.6 (0.6) | 65.8 (0.8) | <b>74.0 (0.5)</b> | 72.2 (0.8)        | 65.4 (0.5) |
|          | 480   | Balanced   | Noiseless    | 68.8 (0.4)        | 63.4 (1.8) | 75.9 (0.4)        | 69.5 (0.4) | 69.5 (0.3) | <b>78.2 (0.3)</b> | 77.9 (0.3)        | 70.5 (0.3) |
| AVIRIS   | 30    | Balanced   | Noiseless    | 77.3 (1.7)        | 76.1 (2.0) | 66.2 (1.4)        | 68.7 (1.2) | 69.8 (2.3) | <b>78.5 (1.8)</b> | 73.4 (1.6)        | 69.1 (1.3) |
|          | 120   | Balanced   | Noiseless    | 83.4 (0.7)        | 80.0 (1.3) | 79.0 (0.8)        | 77.4 (0.9) | 78.9 (1.0) | <b>84.8 (0.7)</b> | 83.7 (0.9)        | 78.0 (0.7) |
|          | 480   | Balanced   | Noiseless    | 77.6 (0.6)        | 73.3 (0.6) | 77.0 (1.1)        | 71.7 (1.4) | 70.5 (1.9) | 80.1 (1.2)        | <b>81.2 (1.1)</b> | 72.1 (1.3) |
| Pavia    | 30    | S-prop.    | Noiseless    | <b>85.3 (2.6)</b> | 76.8 (3.5) | <b>85.0 (1.7)</b> | 78.2 (1.7) | 73.2 (3.3) | 82.0 (1.9)        | 81.6 (1.7)        | 77.7 (1.7) |
|          | 480   | S-prop.    | Noiseless    | 92.2 (0.3)        | 83.2 (0.9) | <b>93.6 (0.3)</b> | 90.2 (0.3) | 87.4 (0.5) | 90.8 (0.4)        | 86.2 (0.4)        | 80.1 (0.3) |
|          | 30    | D-prop.    | Noiseless    | <b>80.5 (2.5)</b> | 68.2 (3.5) | 79.4 (2.0)        | 70.8 (1.5) | 69.0 (2.5) | 75.5 (2.2)        | 75.5 (1.8)        | 70.3 (1.5) |
|          | 480   | D-prop.    | Noiseless    | 88.4 (0.5)        | 79.1 (1.1) | 89.5 (0.5)        | 80.7 (0.7) | 78.7 (2.2) | 85.8 (0.7)        | <b>91.8 (0.4)</b> | 88.5 (0.4) |
| AISA     | 30    | S-prop.    | Noiseless    | 64.6 (1.1)        | 59.3 (7.3) | 62.3 (1.3)        | 58.5 (1.2) | 60.7 (1.8) | <b>69.5 (1.3)</b> | 63.1 (1.4)        | 59.0 (1.0) |
|          | 480   | S-prop.    | Noiseless    | 71.7 (0.5)        | 66.1 (1.1) | 79.4 (0.4)        | 73.5 (0.4) | 73.4 (0.3) | <b>82.0 (0.3)</b> | 77.9 (0.3)        | 70.5 (0.3) |
|          | 30    | D-prop.    | Noiseless    | 63.9 (0.7)        | 59.4 (6.1) | 61.2 (1.2)        | 57.5 (0.9) | 59.5 (1.7) | <b>67.9 (1.1)</b> | 62.5 (1.4)        | 57.9 (1.2) |
|          | 480   | D-prop.    | Noiseless    | 70.0 (0.4)        | 64.7 (1.2) | 77.0 (0.3)        | 70.8 (0.3) | 70.5 (0.2) | 79.1 (0.3)        | <b>81.5 (0.2)</b> | 74.7 (0.3) |
| AVIRIS   | 30    | S-prop.    | Noiseless    | <b>81.1 (1.3)</b> | 73.7 (1.2) | 68.4 (1.6)        | 71.8 (2.0) | 72.0 (2.5) | 79.7 (2.8)        | 75.6 (1.7)        | 71.9 (2.3) |
|          | 480   | S-prop.    | Noiseless    | 90.8 (0.4)        | 85.9 (0.5) | 90.8 (0.5)        | 88.6 (0.5) | 86.9 (0.5) | 91.8 (0.4)        | <b>92.8 (0.4)</b> | 89.1 (0.5) |
|          | 30    | D-prop.    | Noiseless    | <b>77.4 (1.3)</b> | 73.0 (1.5) | 65.7 (1.2)        | 68.5 (1.6) | 70.0 (2.4) | <b>76.8 (1.9)</b> | 73.4 (1.5)        | 68.7 (1.6) |
|          | 480   | D-prop.    | Noiseless    | 71.9 (0.5)        | 67.1 (0.5) | 70.9 (0.6)        | 69.6 (0.6) | 66.8 (0.5) | 72.7 (0.5)        | <b>74.0 (0.6)</b> | 69.4 (0.5) |
| Pavia    | 30    | Balanced   | Weak Noise   | 66.3 (4.9)        | 59.8 (4.3) | 73.2 (3.3)        | 68.4 (2.6) | 62.9 (2.8) | <b>76.3 (2.4)</b> | 70.7 (2.4)        | 68.6 (2.2) |
|          | 480   | Balanced   | Weak Noise   | 71.0 (1.8)        | 55.3 (4.0) | <b>86.9 (0.8)</b> | 81.5 (0.7) | 72.1 (0.8) | 84.4 (0.7)        | 84.0 (0.7)        | 79.7 (0.5) |
|          | 30    | Balanced   | Strong Noise | 55.2 (7.1)        | 51.1 (4.6) | 68.3 (4.6)        | 62.4 (3.2) | 56.8 (3.6) | <b>73.2 (4.1)</b> | 66.7 (3.6)        | 63.4 (3.6) |
|          | 480   | Balanced   | Strong Noise | 68.3 (2.3)        | 51.9 (3.6) | <b>85.1 (0.9)</b> | 79.7 (1.1) | 68.2 (1.0) | 83.7 (0.7)        | 82.2 (0.8)        | 78.2 (0.9) |
| AISA     | 30    | Balanced   | Weak Noise   | 59.2 (1.9)        | 58.8 (2.1) | 58.8 (1.3)        | 56.2 (1.4) | 55.7 (1.9) | <b>67.3 (1.1)</b> | 59.1 (1.4)        | 55.8 (1.2) |
|          | 480   | Balanced   | Weak Noise   | 67.0 (0.6)        | 57.9 (2.4) | 73.9 (0.3)        | 69.3 (0.3) | 67.0 (0.6) | <b>77.9 (0.6)</b> | 76.3 (0.4)        | 70.1 (0.3) |
|          | 30    | Balanced   | Strong Noise | 54.1 (1.8)        | 53.9 (2.7) | 55.6 (2.2)        | 53.6 (1.9) | 51.5 (2.2) | <b>66.9 (1.1)</b> | 55.1 (1.9)        | 52.1 (1.8) |
|          | 480   | Balanced   | Strong Noise | 65.4 (0.7)        | 56.0 (1.6) | 71.2 (0.5)        | 68.7 (0.4) | 64.6 (0.8) | <b>77.0 (0.3)</b> | 73.6 (0.6)        | 69.0 (0.3) |
| AVIRIS   | 30    | Balanced   | Weak Noise   | 71.0 (2.7)        | 67.2 (3.4) | 61.4 (2.4)        | 66.8 (1.7) | 64.6 (2.3) | <b>77.7 (1.9)</b> | 67.0 (2.6)        | 67.1 (2.0) |
|          | 480   | Balanced   | Weak Noise   | 72.1 (1.7)        | 50.9 (1.3) | 72.3 (2.1)        | 71.7 (1.4) | 69.4 (1.0) | <b>79.0 (1.5)</b> | 77.1 (1.8)        | 71.8 (1.6) |
|          | 30    | Balanced   | Strong Noise | 64.4 (4.5)        | 59.4 (3.1) | 56.6 (3.7)        | 63.1 (3.3) | 59.9 (2.6) | <b>76.5 (3.1)</b> | 62.7 (3.7)        | 63.1 (3.0) |
|          | 480   | Balanced   | Strong Noise | 65.8 (2.1)        | 46.3 (1.4) | 69.2 (1.7)        | 70.1 (1.8) | 67.3 (1.0) | <b>78.3 (1.0)</b> | 74.2 (2.3)        | 69.9 (1.4) |
